# Supplementary material
Source: publisher site journal article supplement (https://www.dovepress.com/article/409006)
Supplement: Supplementary file 1 [file get_supplementary_file.php]

# Table S1. Anoikis-related genes list

| Gene Symbol |
| --- |
| ABHD2 |
| ABHD4 |
| ABL1 |
| ADCY10 |
| AFAP1L1 |
| AFP |
| AKT1 |
| AKT3 |
| ANGPTL2 |
| ANGPTL4 |
| ANKRD13C |
| ANXA5 |
| APOBEC3G |
| AR |
| ARHGEF7 |
| ATF4 |
| BAD |
| BAG1 |
| BAK1 |
| BAX |
| BCAR1 |
| BCL2 |
| BCL2L1 |
| BCL2L11 |
| BCL2L15 |
| BDNF |
| BID |
| BIRC3 |
| BIRC5 |
| BMF |
| BMP6 |
| BNIP3 |
| BNIP3L |
| BRAF |
| BRCA2 |
| BRMS1 |
| BSG |
| BST2 |
| CALR |
| CASP10 |
| CASP2 |
| CASP3 |
| CASP6 |
| CASP8 |
| CASP9 |
| CAV1 |
| CBL |
| CCND1 |
| CCR7 |
| CD151 |
| CD24 |
| CD36 |
| CD44 |
| CD63 |
| CDCP1 |
| CDH1 |
| CDH2 |
| CDH3 |
| CDKN1A |
| CDKN1B |
| CDKN2A |
| CDKN3 |
| CEACAM1 |
| CEACAM3 |
| CEACAM5 |
| CEACAM6 |
| CEBPB |
| CFLAR |
| CHEK2 |
| CHUK |
| CLDN1 |
| COL13A1 |
| COL4A2 |
| COPS5 |
| CPEB2 |
| CPT1A |
| CRYAB |
| CSNK2A1 |
| CSPG4 |
| CTNNB1 |
| CTNND1 |
| CTTN |
| CXCL12 |
| CXCR4 |
| CYCS |
| DAP3 |
| DAPK1 |
| DAPK2 |
| DLG1 |
| DOCK1 |
| E2F1 |
| EDIL3 |
| EEF1A1 |
| EEF2K |
| EGF |
| EGFR |
| EIF2AK3 |
| ELANE |
| ELK1 |
| EPHA2 |
| EPHB6 |
| ERBB2 |
| ETV4 |
| EZH2 |
| FADD |
| FAS |
| FASLG |
| FASN |
| FER |
| FGF2 |
| FN1 |
| GLI2 |
| GLO1 |
| GLUD1 |
| GRHL2 |
| HAVCR2 |
| HGF |
| HIF1A |
| HK2 |
| HMCN1 |
| HMGA1 |
| HMOX1 |
| HOXA10 |
| HRAS |
| HTRA1 |
| IFI27 |
| IGF1 |
| IGF1R |
| IKBKG |
| IKZF3 |
| IL6 |
| ILK |
| INHBB |
| IQGAP1 |
| ITGA2 |
| ITGA3 |
| ITGA4 |
| ITGA5 |
| ITGA6 |
| ITGA8 |
| ITGAV |
| ITGB1 |
| ITGB3 |
| ITGB4 |
| ITPRIP |
| KDR |
| KL |
| KLF12 |
| KRAS |
| LAMA3 |
| LAMB3 |
| LAMC2 |
| LATS1 |
| LGALS1 |
| LGALS3 |
| LMO3 |
| LPAR1 |
| LRP1 |
| LTB4R2 |
| LTF |
| MAP2K1 |
| MAP3K7 |
| MAPK1 |
| MAPK11 |
| MAPK3 |
| MAPK8 |
| MCL1 |
| MDM2 |
| MET |
| MIR200A |
| MIR204 |
| MIR21 |
| MIR30B |
| MMP11 |
| MMP13 |
| MMP2 |
| MMP9 |
| MNX1 |
| MSLN |
| MTA1 |
| MTDH |
| MUC1 |
| MYBBP1A |
| MYC |
| MYH9 |
| MYO5A |
| NAT1 |
| NFE2L2 |
| NOTCH1 |
| NOTCH3 |
| NOX4 |
| NQO1 |
| NRAS |
| NRP1 |
| NTF3 |
| NTRK2 |
| PAK1 |
| PAK2 |
| PAK3 |
| PAK4 |
| PARP1 |
| PBK |
| PDCD4 |
| PDGFRB |
| PDK4 |
| PECAM1 |
| PHLDA2 |
| PIK3CA |
| PIK3CB |
| PIK3CG |
| PIK3R1 |
| PIK3R2 |
| PIK3R3 |
| PIN1 |
| PLAT |
| PLAU |
| PLAUR |
| PLK1 |
| PPARG |
| PPP1R13B |
| PPP2CA |
| PPP2R1A |
| PPP2R2D |
| PPP2R5A |
| PRDX4 |
| PRKACA |
| PRKCA |
| PRKCI |
| PRKCQ |
| PRKD1 |
| PRPF4B |
| PTEN |
| PTGS2 |
| PTHLH |
| PTK2 |
| PTK2B |
| PTK6 |
| PTPN1 |
| PTPN11 |
| PTRH2 |
| PYCARD |
| RAC1 |
| RAD9A |
| RAF1 |
| RANBP9 |
| RB1 |
| RBL2 |
| RELA |
| RHOA |
| RHOB |
| RHOC |
| RHOG |
| RIPK1 |
| ROCK1 |
| RPS6KB1 |
| S100A4 |
| SATB1 |
| SCRIB |
| SDCBP |
| SERPINA1 |
| SESN1 |
| SESN2 |
| SESN3 |
| SFN |
| SH3GLB1 |
| SHC1 |
| SIK1 |
| SIK2 |
| SIRPA |
| SIRT1 |
| SIRT3 |
| SKP2 |
| SLC2A1 |
| SLCO1B3 |
| SMAD4 |
| SNAI2 |
| SOD2 |
| SP1 |
| SPIB |
| SPINK1 |
| SRC |
| STAT3 |
| STK11 |
| TAGLN |
| TFDP1 |
| THBS1 |
| TIMP1 |
| TLE1 |
| TLN1 |
| TLR3 |
| TNFRSF10B |
| TNFRSF12A |
| TNFRSF1A |
| TNFSF10 |
| TP53 |
| TPM1 |
| TRAF2 |
| TRIM31 |
| TSC2 |
| TSG101 |
| TUBB3 |
| TWIST1 |
| UBE2C |
| UCHL1 |
| USP9X |
| VEGFA |
| VPS37A |
| WNT2 |
| XIAP |
| YAP1 |
| YWHAZ |
| ZBTB7A |
| ZEB1 |
| ZEB2 |
| ZNF304 |
| ZNF32 |


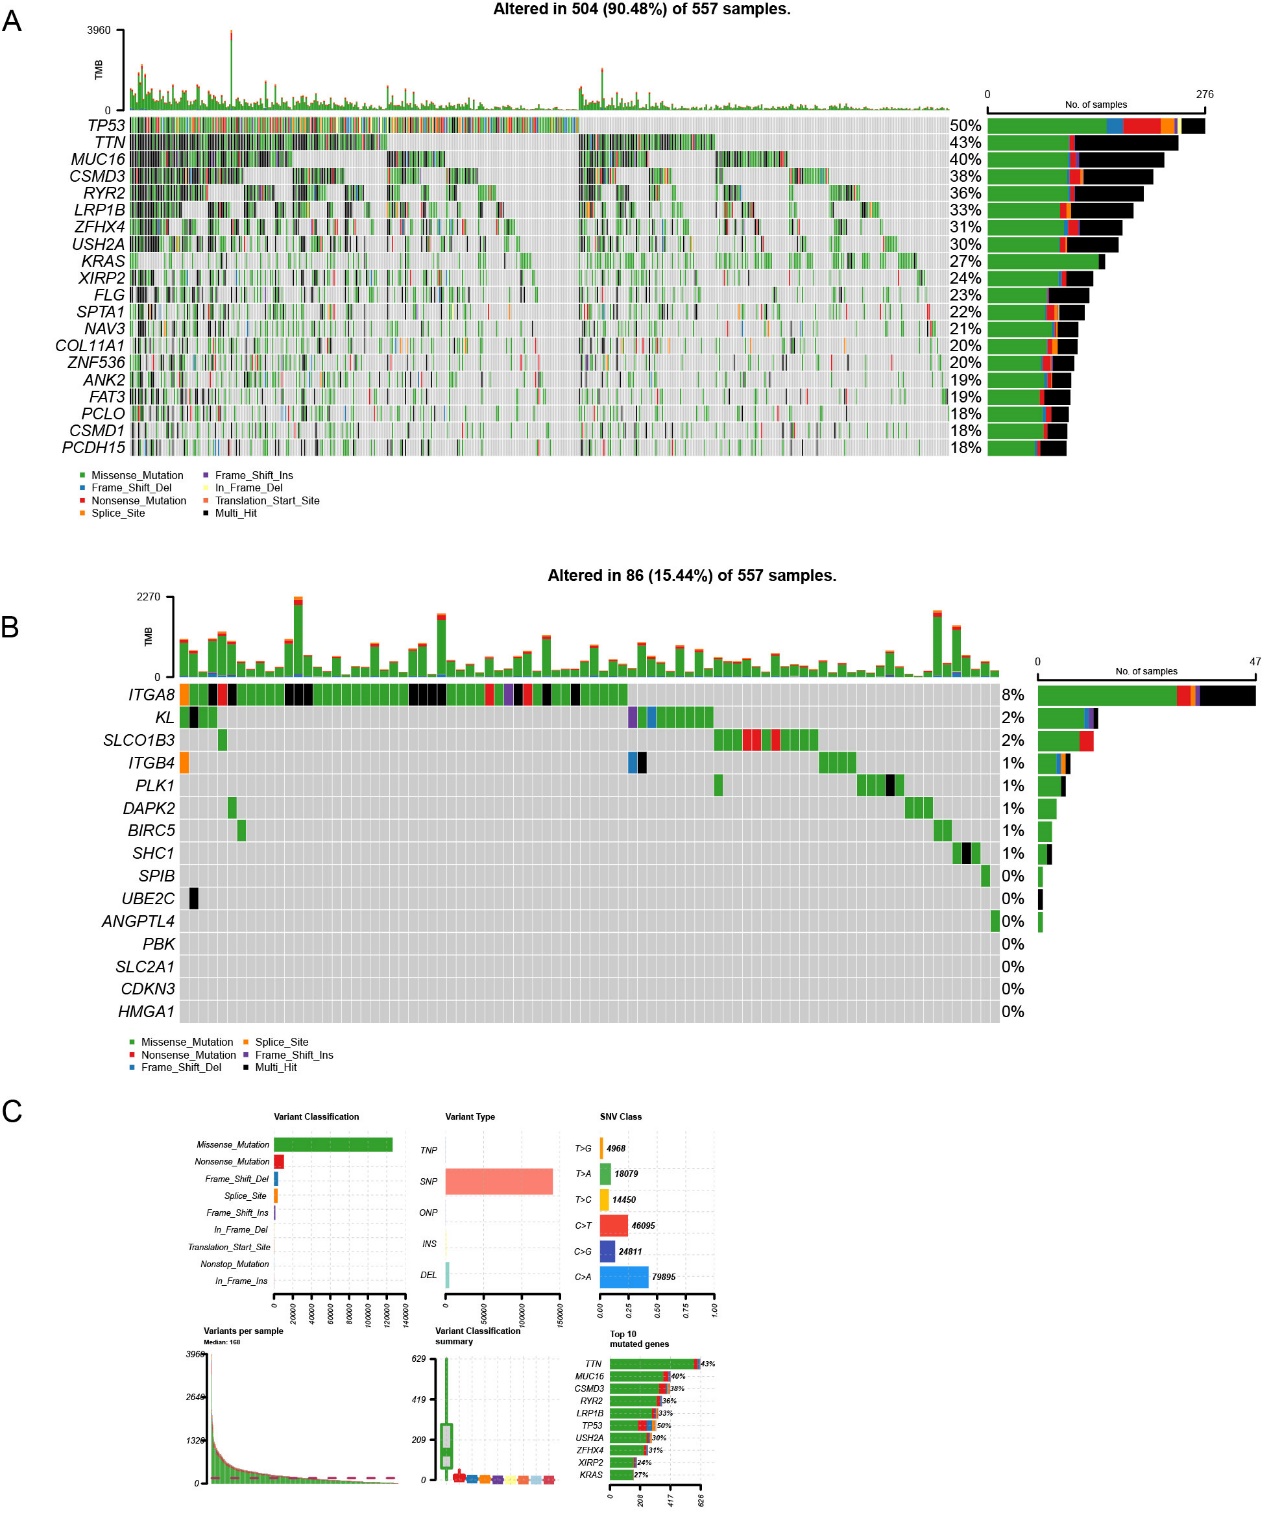


Figure S1

Variations of LUAD in the TCGA dataset.

A: Mutation loads of LUAD.

B: Alteration loads of LUAD in anoikis-related genes.

C: Variant classification and variant types of LUAD.
